# Supplementary material for: Neutrophils with myeloid derived suppressor function deplete arginine and constrain T cell function in septic shock patients
Source: PubMed Central journal article supplement (PMC4261583; doi:10.1186/cc14003), 2014-08-01

# Interphase

Day 0

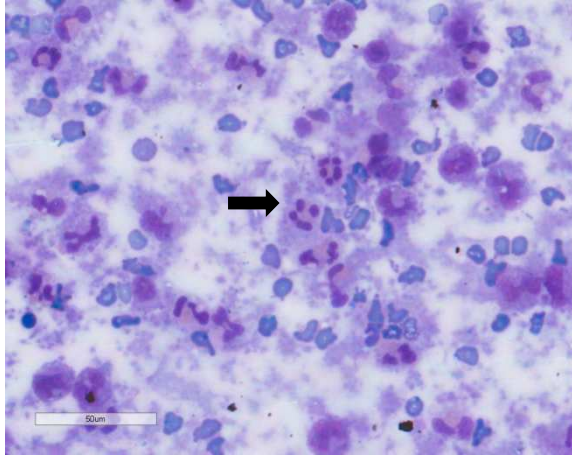

Day 3

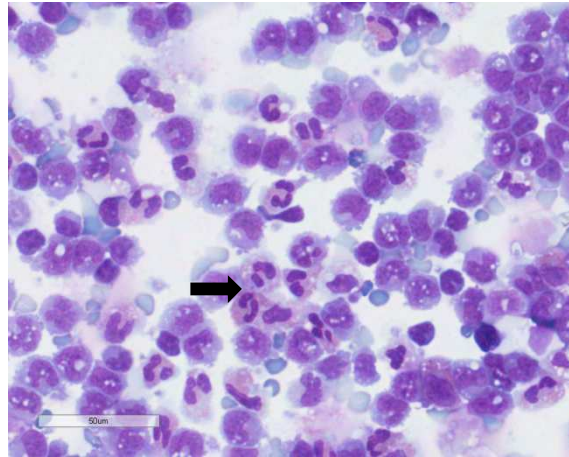

Day 4

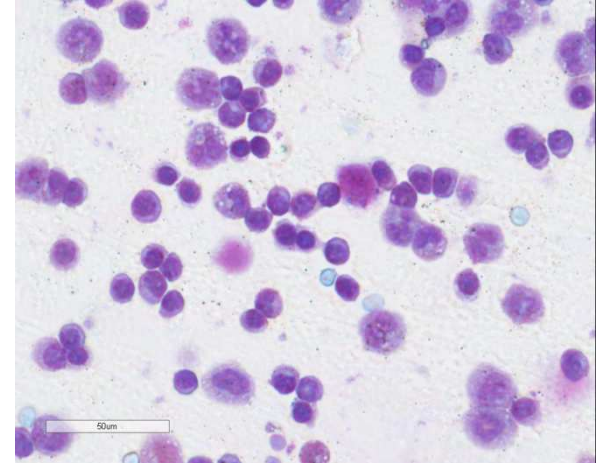

# PMN

Day 0

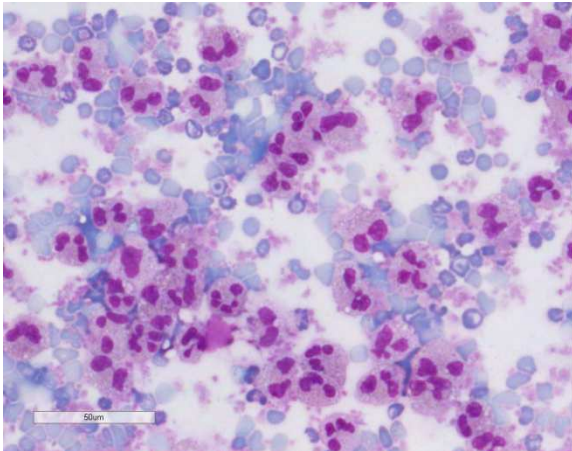

Day 3

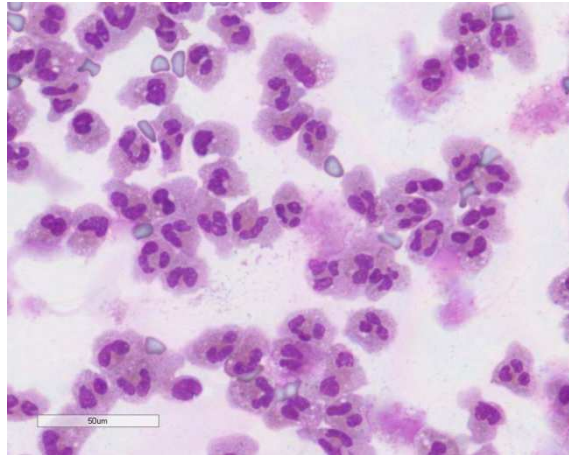

Day 4

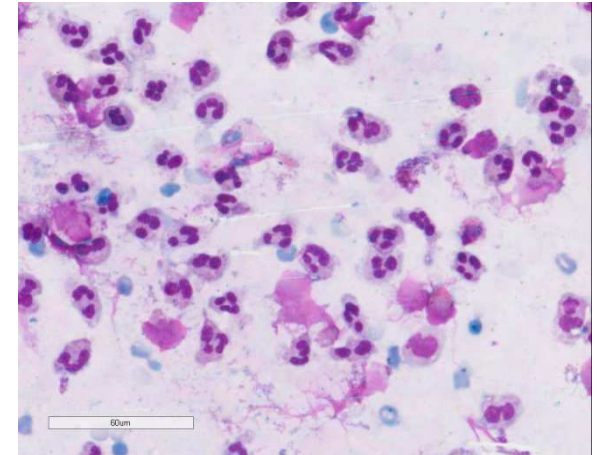

Supplement: 13054_2014_2719_MOESM2_ESM.pdf [file 13054_2014_2719_MOESM2_ESM.pdf]
