# Supplementary material for: Neutrophils with myeloid derived suppressor function deplete arginine and constrain T cell function in septic shock patients
Source: PubMed Central journal article supplement (PMC4261583; doi:10.1186/cc14003), 2014-08-01

**Person A**

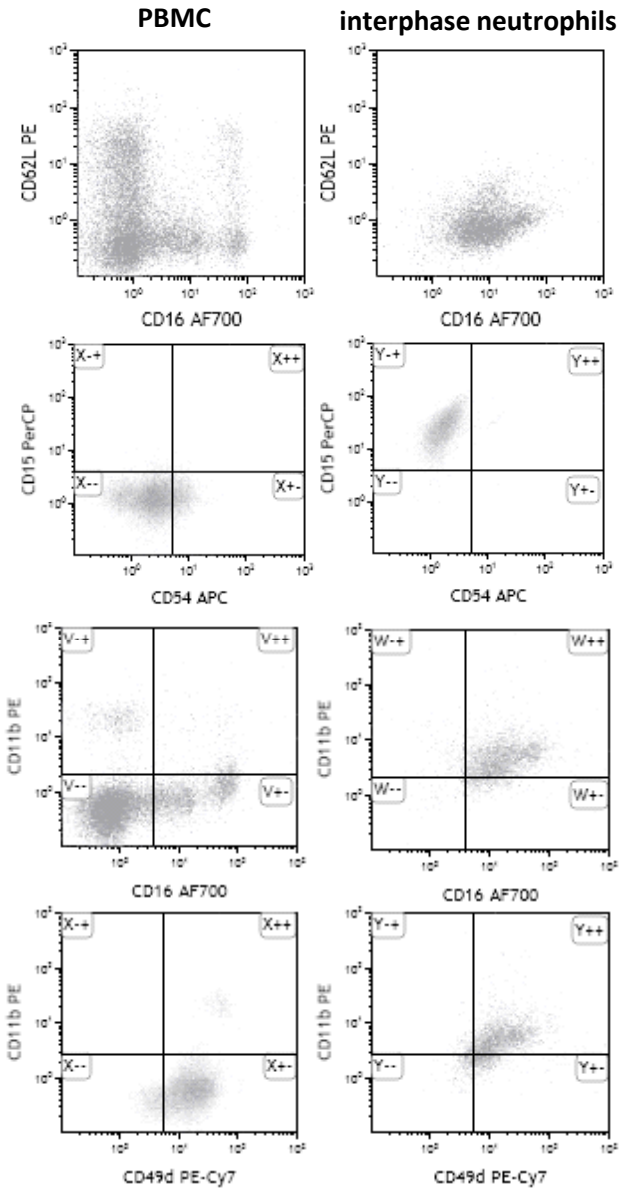

**Person B**

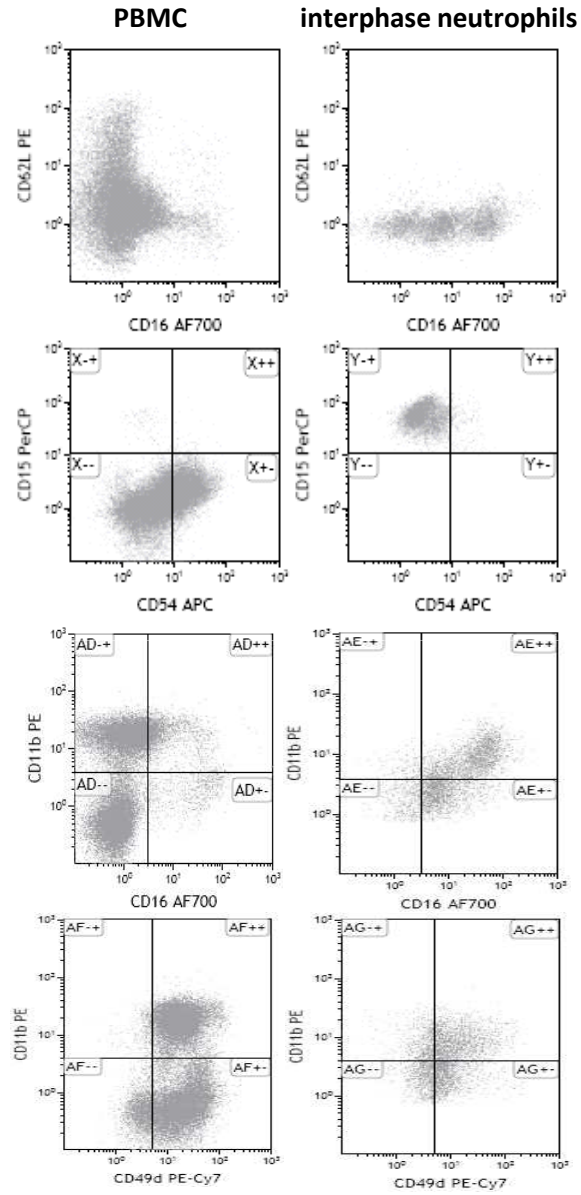

Supplement: 13054_2014_2719_MOESM3_ESM.pdf [file 13054_2014_2719_MOESM3_ESM.pdf]
