# Supplementary material for: Neutrophils with myeloid derived suppressor function deplete arginine and constrain T cell function in septic shock patients
Source: PubMed Central journal article supplement (PMC4261583; doi:10.1186/cc14003), 2014-08-01
Supplement: 13054_2014_2719_MOESM4_ESM.pdf [file 13054_2014_2719_MOESM4_ESM.pdf]

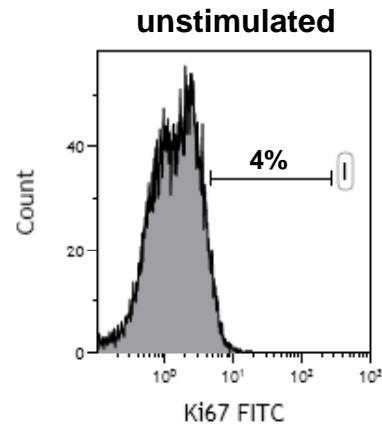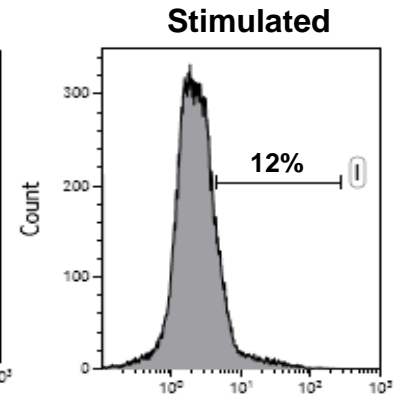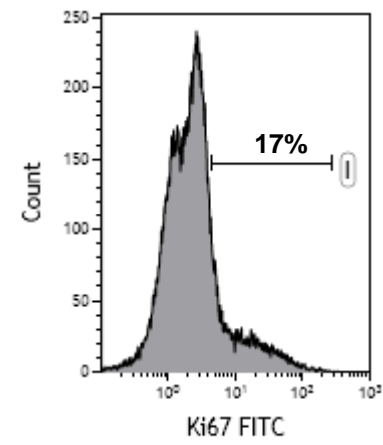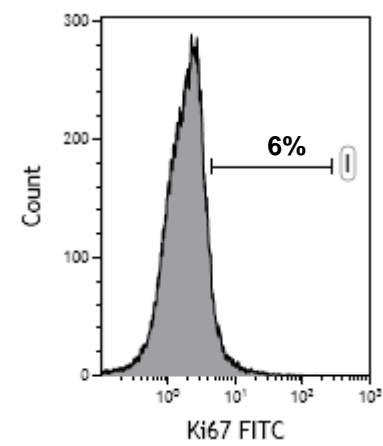

Plots show a minimum of 50,000 CD3+ T cells

**Total interphase cells  
PBMC and neutrophil-MDSC**

**PBMC (interphase depleted of CD66b+ cells)**

**PBMC plus CD66b+ cell add back**
